# Supplementary material for: Antigens from the Helminth Fasciola hepatica Exert Antiviral Effects against SARS-CoV-2 In Vitro
Source: MDPI journal article supplement (doi:10.3390/ijms241411597), 2023-07-18
Supplement: s1 [file s1]

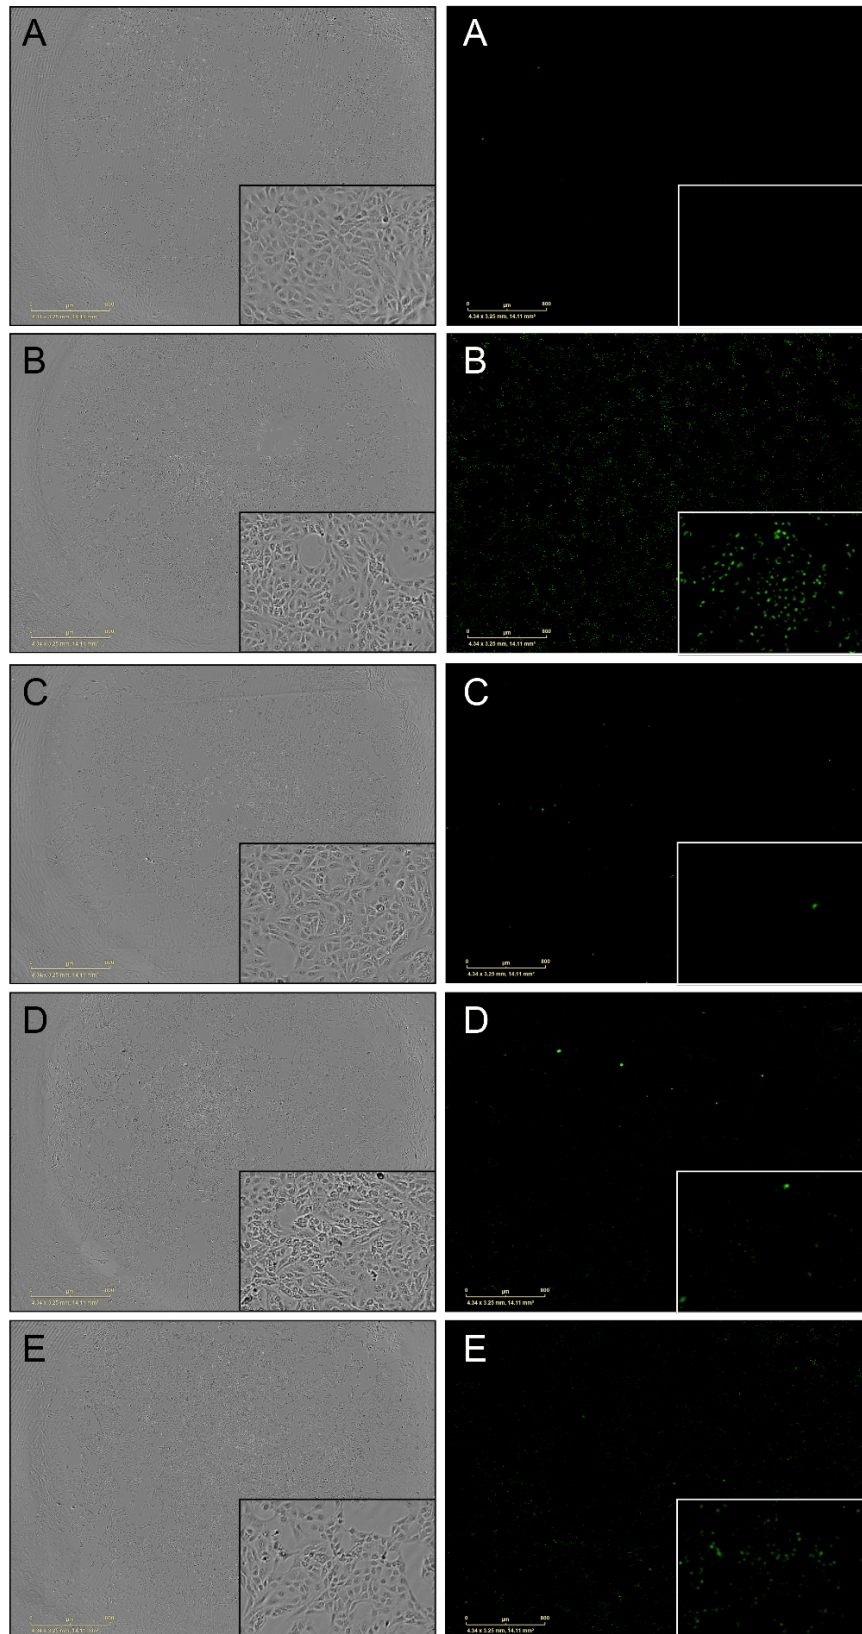

**Figure S2. Related to Figure 3. Quantification of live SARS-CoV-2 infection efficiency.** Example pictures of Vero cells left uninfected (A), mock-treated (B) prior to infection with SARS-CoV-2, infected with virus pre-treated with remdesivir (C) and pre-treated with FhNEJ-TEG (D) or FhNEJ-SOM (E) prior to infection with SARS-CoV-2. Left panels show the bright field images, right panels show the green fluorescence channel (CFL 488) and small panels show an example field with increased magnification for visualization purposes.
